# Supplementary material for: dsRNA-Seq: Identification of Viral Infection by Purifying and Sequencing dsRNA
Source: MDPI journal article supplement (doi:10.3390/v11100943), 2019-10-14
Supplement: s1 [file s1]

A.

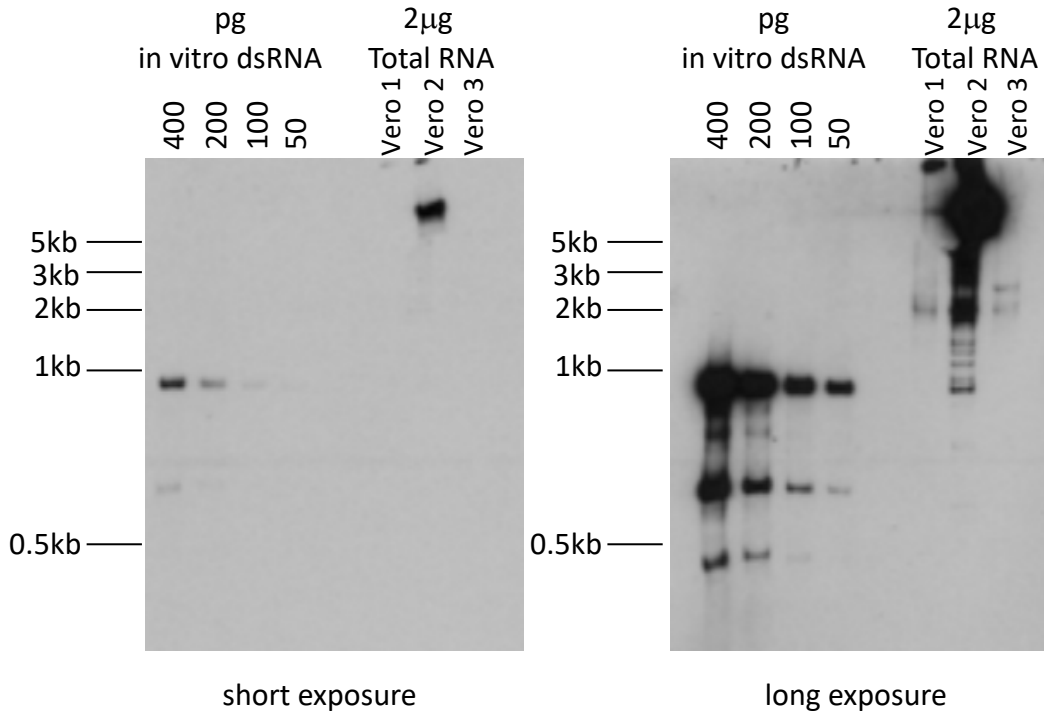

B.

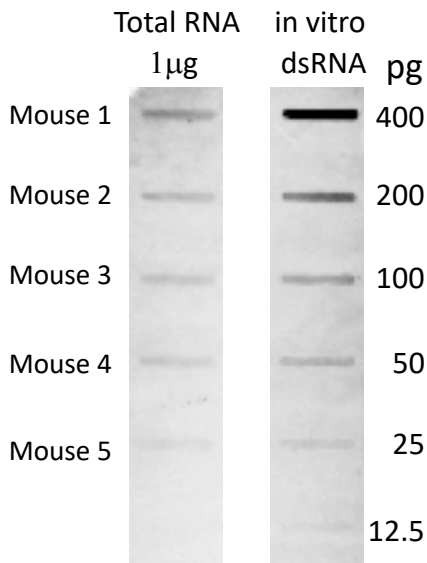

**Figure S1. Immunoblot analysis of total RNA samples using anti-dsRNA antibody**

Antibody against dsRNA was used to estimate the amount of dsRNA in total RNA isolated from Vero cell samples or mouse tissue samples. Immunoblotting was performed as described in [22, 25] (a) Blot of native acrylamide gel containing 2  $\mu$ g of total RNA from Vero cell samples or dilution series of known amount of in vitro transcribed 0.9kb dsRNA [22]. (b) 1  $\mu$ g of total RNA from each mouse total RNA sample was loaded in a slot blot and compared to a dilution series of in vitro transcribed 0.9kb dsRNA.
